# Supplementary material
Source: PubMed Central journal article supplement (PMC3340180)

*Supplementary Figure S1. Epitope labelling of living cells confirms results on fixed cells*

COS7 cells transfected with CNNM2a expression constructs with a HA-tag at positions 211 (HA211), 745 (HA745) or at the C-terminus (C-HA) showed correct targeting to the plasma membrane as demonstrated by immunostaining (in red) after formaldehyde fixation and permeabilization (upper panels). Immunostaining of living COS7 cells for the HA-epitope before fixation resulted in detection of HA211 only (lower panels). Nuclei stained with DAPI are shown in blue, size bar represents 50  $\mu\text{m}$  in each panel.

*Supplementary Figure S2. The CNNM2 N-terminus is retained in the perinuclear endoplasmic reticulum*

(A) COS7 cells transfected with CNNM2a expression constructs with an HA-tag at the N-terminus (N-HA) or at position 25 without (HA25) or with (HA25-FLAG) an additional C-terminal FLAG-tag were permeabilized and co-immunostained with anti-HA (in red) and anti-Calnexin (CNX, in green). Merged images on the right show colocalization (in yellow) of the HA-tag with perinuclear parts of the ER. (B) The identical experiment as shown in the lower panel of (A), except for the omission of the primary antibody anti-CN X, excluding cross-staining of the anti-HA antibody. Nuclei stained with DAPI are shown in blue. Size bars represent 25  $\mu\text{m}$  in each panel.

*Supplementary Table S1: Primer sequences used for RT-PCR analysis*

|                | <i>Forward</i>              | <i>Reverse</i>             |
|----------------|-----------------------------|----------------------------|
| <i>Cnnm1</i>   | 5'-ACAGGTCACAGCAAGTCTCG-3'  | 5'-CCCATGTTTTCTCAGAGTC-3'  |
| <i>Cnnm2v1</i> | 5'-GTCTCGCACCTTTGTTGTCA-3'  | 5'-GTCGCTCCGACTGAGAGAAT-3' |
| <i>Cnnm2v2</i> | 5'-CTCACAGCCTCTCCAGGG-3'    | 5'-AGGAAGAGCTGAGCTGGTTG-3' |
| <i>Cnnm3v1</i> | 5'-CCTTAATGCACTCCTGGCTAC-3' | 5'-CTGGGTCTGCTGTTGGTG-3'   |
| <i>Cnnm3v2</i> | 5'-CCTTAATGCACTCCTGGCTAC-3' | 5'-AAAGAGGGAAAGGTGGACTG-3' |
| <i>Cnnm4</i>   | 5'-TCTGGGCCAGTATGTCTCTG-3'  | 5'-CACAGCCATCGAAGGTAGG-3'  |
| <i>Trpm6</i>   | 5'-GTCTCGCACCTTTGTTGTCA-3'  | 5'-GTCGCTCCGACTGAGAGAAT-3' |
| <i>Trpv5</i>   | 5'-CCATGACTCCGCTAGTTGAG-3'  | 5'-TGGATGTCACGTGTCCAGTT-3' |
| <i>Gapdh</i>   | 5'-TAACATCAAATGGGGTGAGG-3'  | 5'-GGTTCACACCCATCACAAAC-3' |

# Figure S1

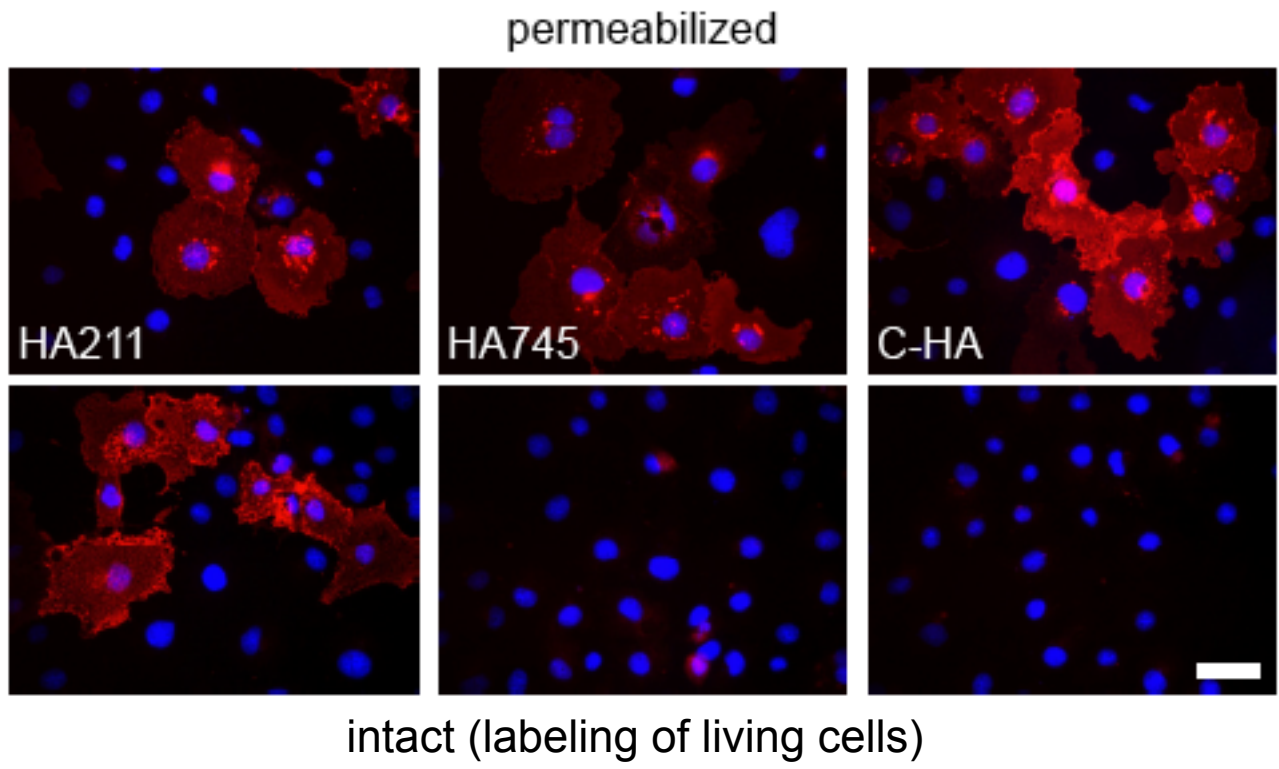

# Figure S2

## A

N-HA

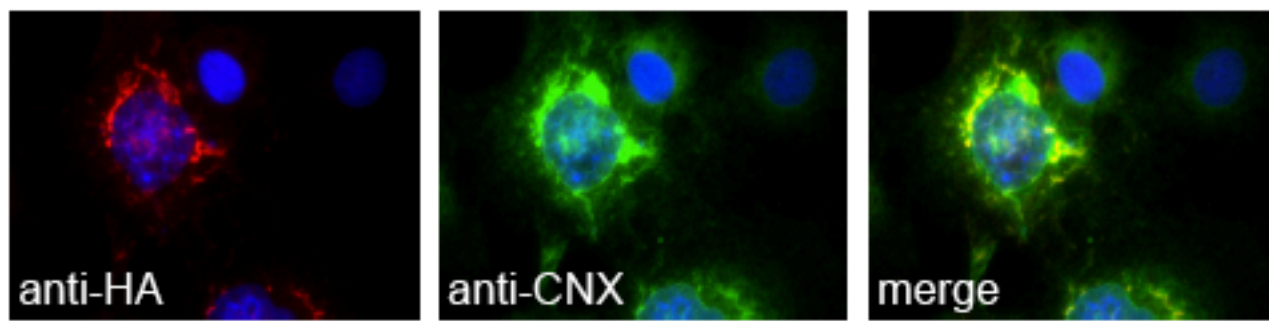

HA25

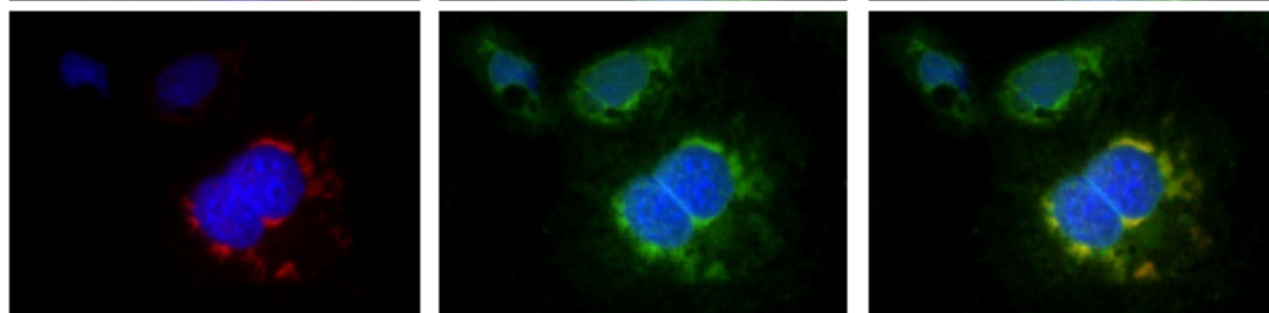

HA25-FLAG

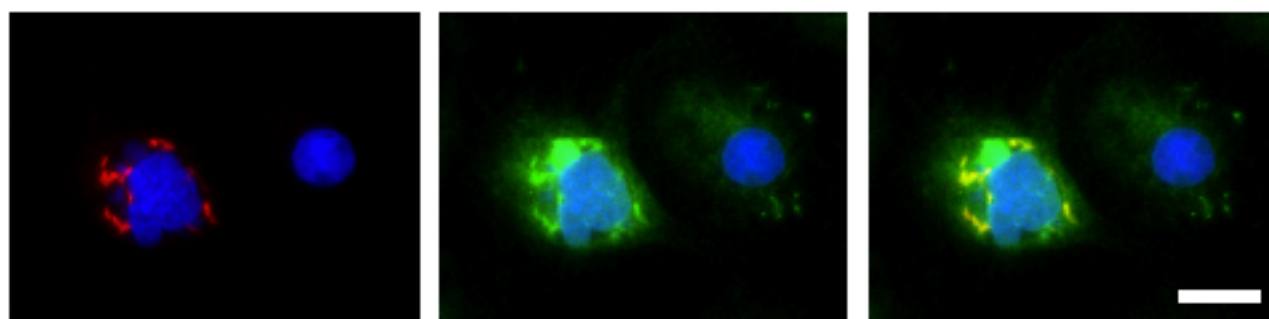

## B

HA25-FLAG

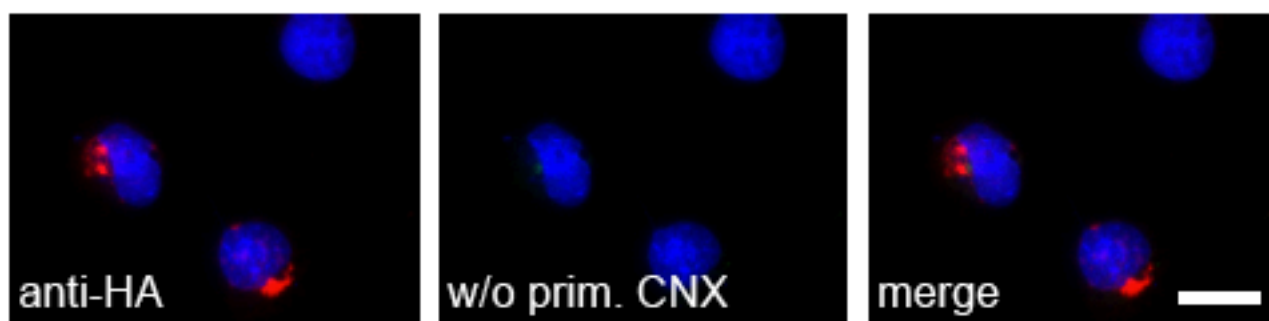

Supplement: supp_M112.342204_jbc.M112.342204-1.pdf [file supp_M112.342204_jbc.M112.342204-1.pdf]
